# Supplementary material
Source: ML conference proceedings conference paper supplement (https://www.ecva.net/papers/eccv_2022/papers_ECCV/html/136910718_ECCV_2022_paper.php)
Supplement: Supplementary file 1 [file 136910718-supp.pdf]

# Supplementary Material

## 1. NETWORK ARCHITECTURE

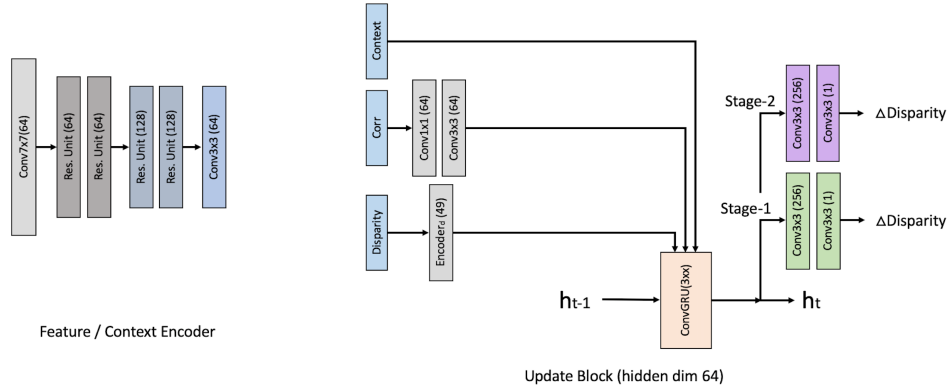

**Fig. S1.** Network architecture details. The context and feature encoders have the same architecture, the only difference is that the feature encoder uses instance normalization while the context encoder uses batch normalization.

## 2. DISCUSSION ON COMPUTATIONAL COST

Fig. S2 compares our method with others on reconstruction quality versus computational cost on the test set of Tanks-and-Temples. We plot two versions of our method (the proposed version in the main paper and a lightweight one with lower input resolution and fewer neighbor views). We see that our method has comparable or better quality-cost tradeoffs than prior works on the intermediate set of Tanks-and-Temples, but is significantly more memory-efficient on the advanced set of Tanks-and-Temples.

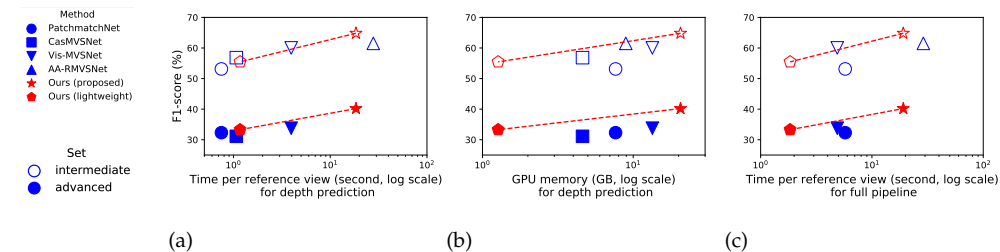

**Fig. S2.** Reconstruction quality versus computational cost. Time is divided by the number of reference views following convention. All methods use the same set of reference views. Memory is measured by `torch.cuda.max_memory_allocated`, which returns the peak allocated memory. All results are measured on an A6000 GPU. We are unable to measure CasMVSNet for subfigure (c) and EPP-MVSNet because certain technical difficulties in installing dependencies and running certain parts of their code on our hardware could not be resolved yet.
